# Supplementary material for: TransCDR: a deep learning model for enhancing the generalizability of drug activity prediction through transfer learning and multimodal data fusion
Source: Research Square preprint supplement (doi:10.21203/rs.3.rs-3875661/v1), 2024-01-22
Supplement: Supplementary file 1 [file 45e2d63073d7fa812f8939c0.docx]

This supplementary document includes supplementary figures and tables that support the manuscript “TransCDR: a deep learning model for enhancing the generalizability of cancer drug response prediction through transfer learning and multimodal data fusion for drug representation”.

# Supplement tables

Table S1. The regression performance of TransCDR on GDSC across cancer types.

Table S2. The regression performance of TransCDR on GDSC across cell lines.

Table S3. The regression performance of TransCDR on GDSC across drugs.

Table S4. The top 10% predicted *IC*50 values of missing CDRs in GDSC.

Table S5. The top 15 drug-cell line pairs predicted by TransCDR.

| Cell line | Drug | Predicted | Study |
| --- | --- | --- | --- |
| RL95-2 | Epothilone B | -8.2074 | [1] |
| HO-1-N-1 | Docetaxel | -8.1868 | [2] |
| SW1710 | Bortezomib | -8.1780 | - |
| CAL-62 | Bortezomib | -8.1630 | - |
| RCC-JW | Bortezomib | -8.1489 | - |
| HOS | Bortezomib | -7.9955 | [3] |
| FTC-133 | Bortezomib | -7.9933 | [4] |
| SW982 | Bortezomib | -7.9876 | [4, 5] |
| HSC-3 | Bortezomib | -7.9808 | [5, 6] |
| A549 | Bortezomib | -7.9547 | [7] |
| A375 | Bortezomib | -7.9531 | [8] |
| IGR-37 | Bortezomib | -7.9493 | [9] |
| KOSC-2 | Docetaxel | -7.9259 | - |
| SU-DHL-10 | Rapamycin | -7.8651 | [10] |
| IHH-4 | Bortezomib | -7.8513 | - |

Table S6. Testing results of TransCDR on CCLE dataset with specific cancer types.

|  | RMSE | Person | Spearman | CI | N_sample |
| --- | --- | --- | --- | --- | --- |
| Bile Duct Cancer | 1.3293 | 0.8926 | 0.7928 | 0.9783 | 14 |
| Rhabdoid | 1.4074 | 0.8085 | 0.6964 | 0.8246 | 40 |
| Thyroid Cancer | 1.8248 | 0.7743 | 0.6463 | 0.7949 | 42 |
| Pancreatic Cancer | 1.7793 | 0.7740 | 0.5878 | 0.7779 | 283 |
| Myeloma | 1.7687 | 0.7565 | 0.5392 | 0.7495 | 154 |
| Sarcoma | 1.7945 | 0.7543 | 0.6321 | 0.7845 | 68 |
| Bone Cancer | 1.5085 | 0.7523 | 0.6105 | 0.8643 | 96 |
| Esophageal Cancer | 1.7980 | 0.7512 | 0.6060 | 0.7763 | 177 |
| Neuroblastoma | 1.7676 | 0.7506 | 0.6381 | 0.8040 | 120 |
| Brain Cancer | 1.4898 | 0.7433 | 0.5958 | 0.8484 | 303 |
| Endometrial/Uterine Cancer | 1.5758 | 0.7397 | 0.5334 | 0.7874 | 204 |
| Head and Neck Cancer | 1.7594 | 0.7266 | 0.4776 | 0.7239 | 93 |
| Skin Cancer | 1.9272 | 0.7230 | 0.4998 | 0.7246 | 505 |
| Lymphoma | 1.8506 | 0.7192 | 0.4794 | 0.7374 | 308 |
| Gastric Cancer | 1.9107 | 0.7154 | 0.5473 | 0.7635 | 180 |
| Prostate Cancer | 1.6134 | 0.7138 | 0.5781 | 0.8478 | 14 |
| Leukemia | 2.1950 | 0.7126 | 0.5686 | 0.7435 | 364 |
| Bladder Cancer | 1.7391 | 0.7107 | 0.5269 | 0.7597 | 153 |
| Colon/Colorectal Cancer | 1.8653 | 0.7072 | 0.5846 | 0.7814 | 274 |
| Ovarian Cancer | 1.6019 | 0.7040 | 0.5805 | 0.8079 | 317 |
| Lung Cancer | 1.8014 | 0.7025 | 0.5531 | 0.7817 | 1062 |
| Breast Cancer | 1.9025 | 0.6809 | 0.4980 | 0.7680 | 388 |
| Liver Cancer | 1.6815 | 0.6548 | 0.5252 | 0.7931 | 176 |
| Kidney Cancer | 1.6108 | 0.6279 | 0.5150 | 0.7858 | 93 |

Table S7. Patient screening results for drugs.

Table S8. Summary of GSEA results.

# Supplement figures


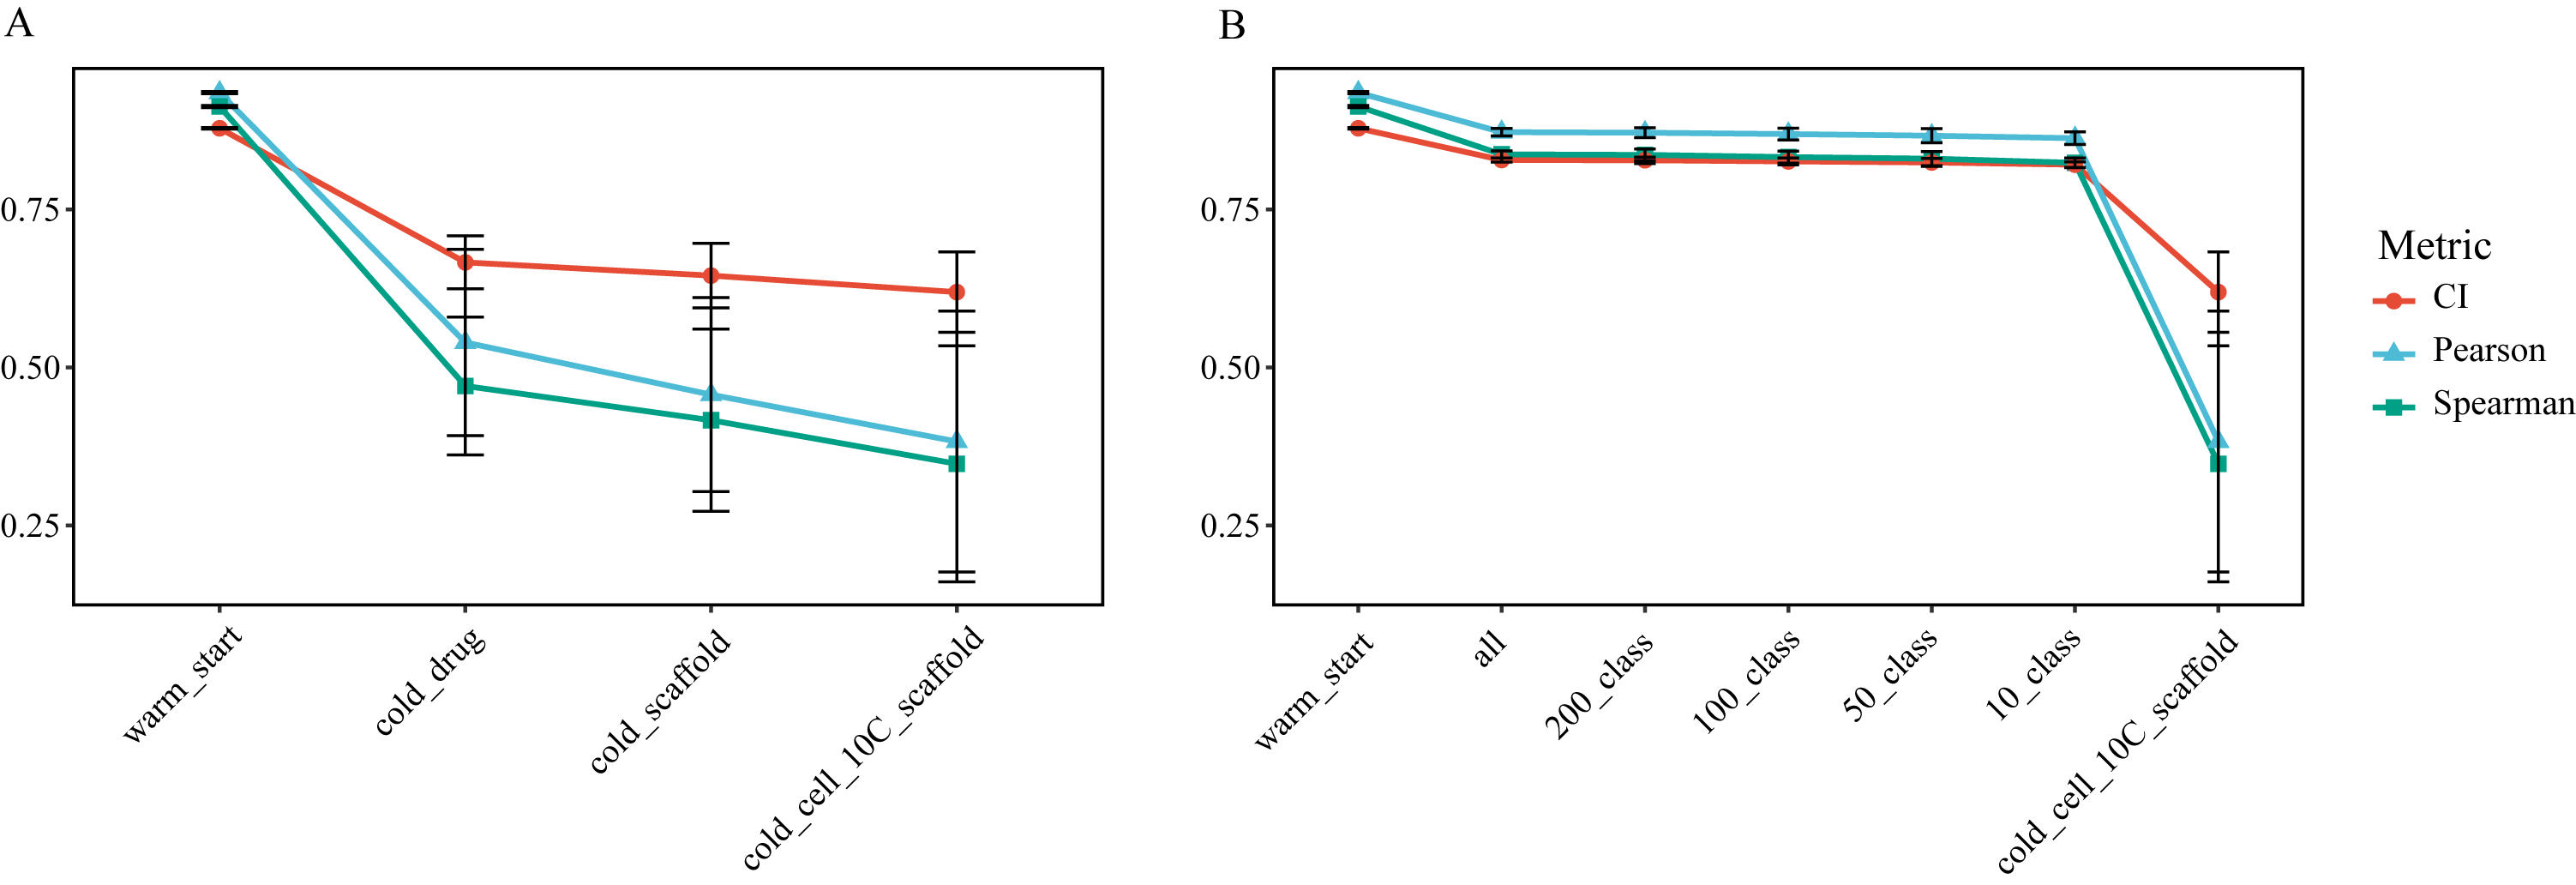


Figure S1. Comparative performance analysis of TransCDR with different data segmentation strategies. Model evaluation results of TransCDR using more strict strategies (A) drug split and (B) cell line strategies. In (B), the cell lines are clustered into 10, 50, 100, and 200 clusters using the K-means algorithm.


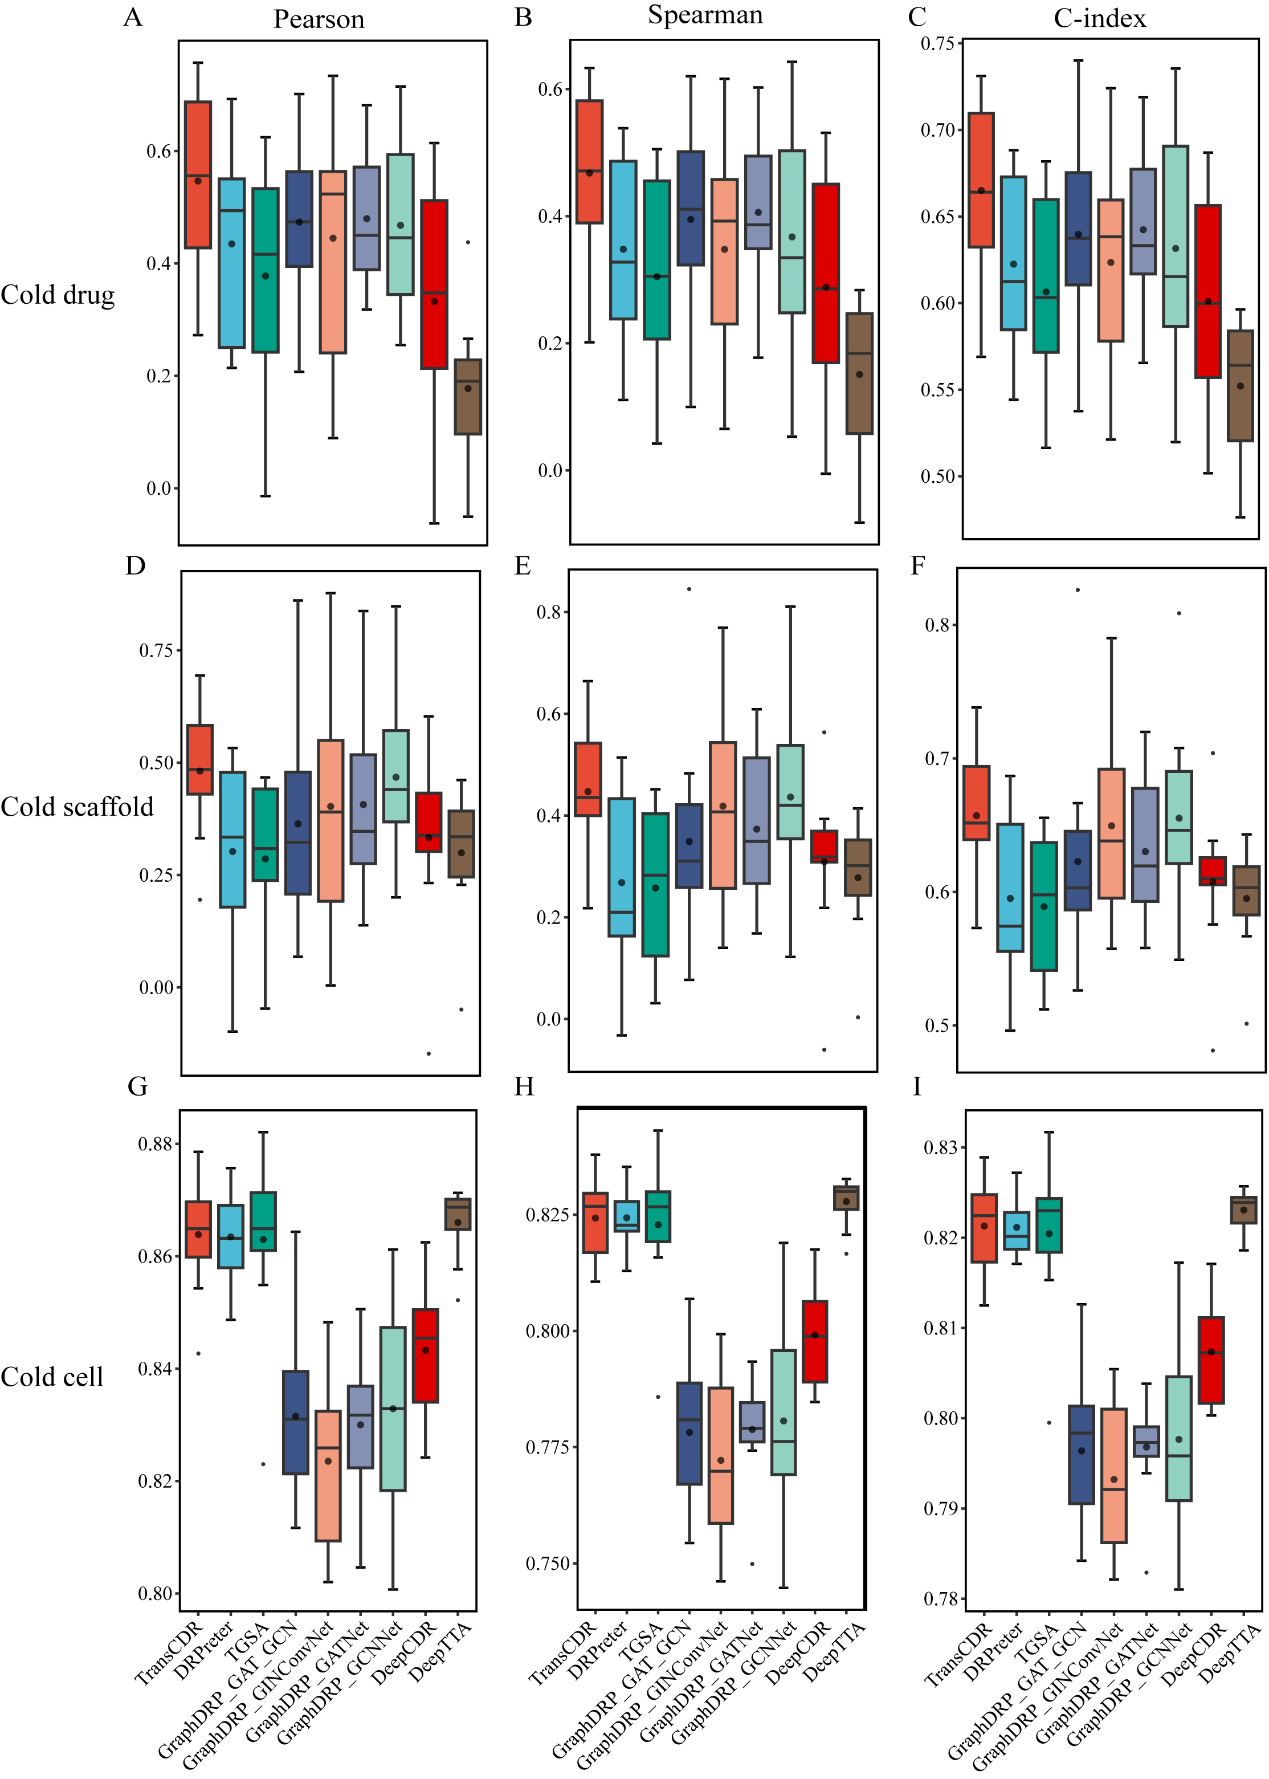


Figure S2. Performance comparisons of TransCDR with DRPreter, TGSA, GraphDRP_GAT_GCN, GraphDRP_GINConvNet, GraphDRP_GATNet, GraphDRP_GCNNet, DeepCDR, and DeepTTA on cold drug (A-C), cold scaffold (D-F) and cold cell (G-I)*.*


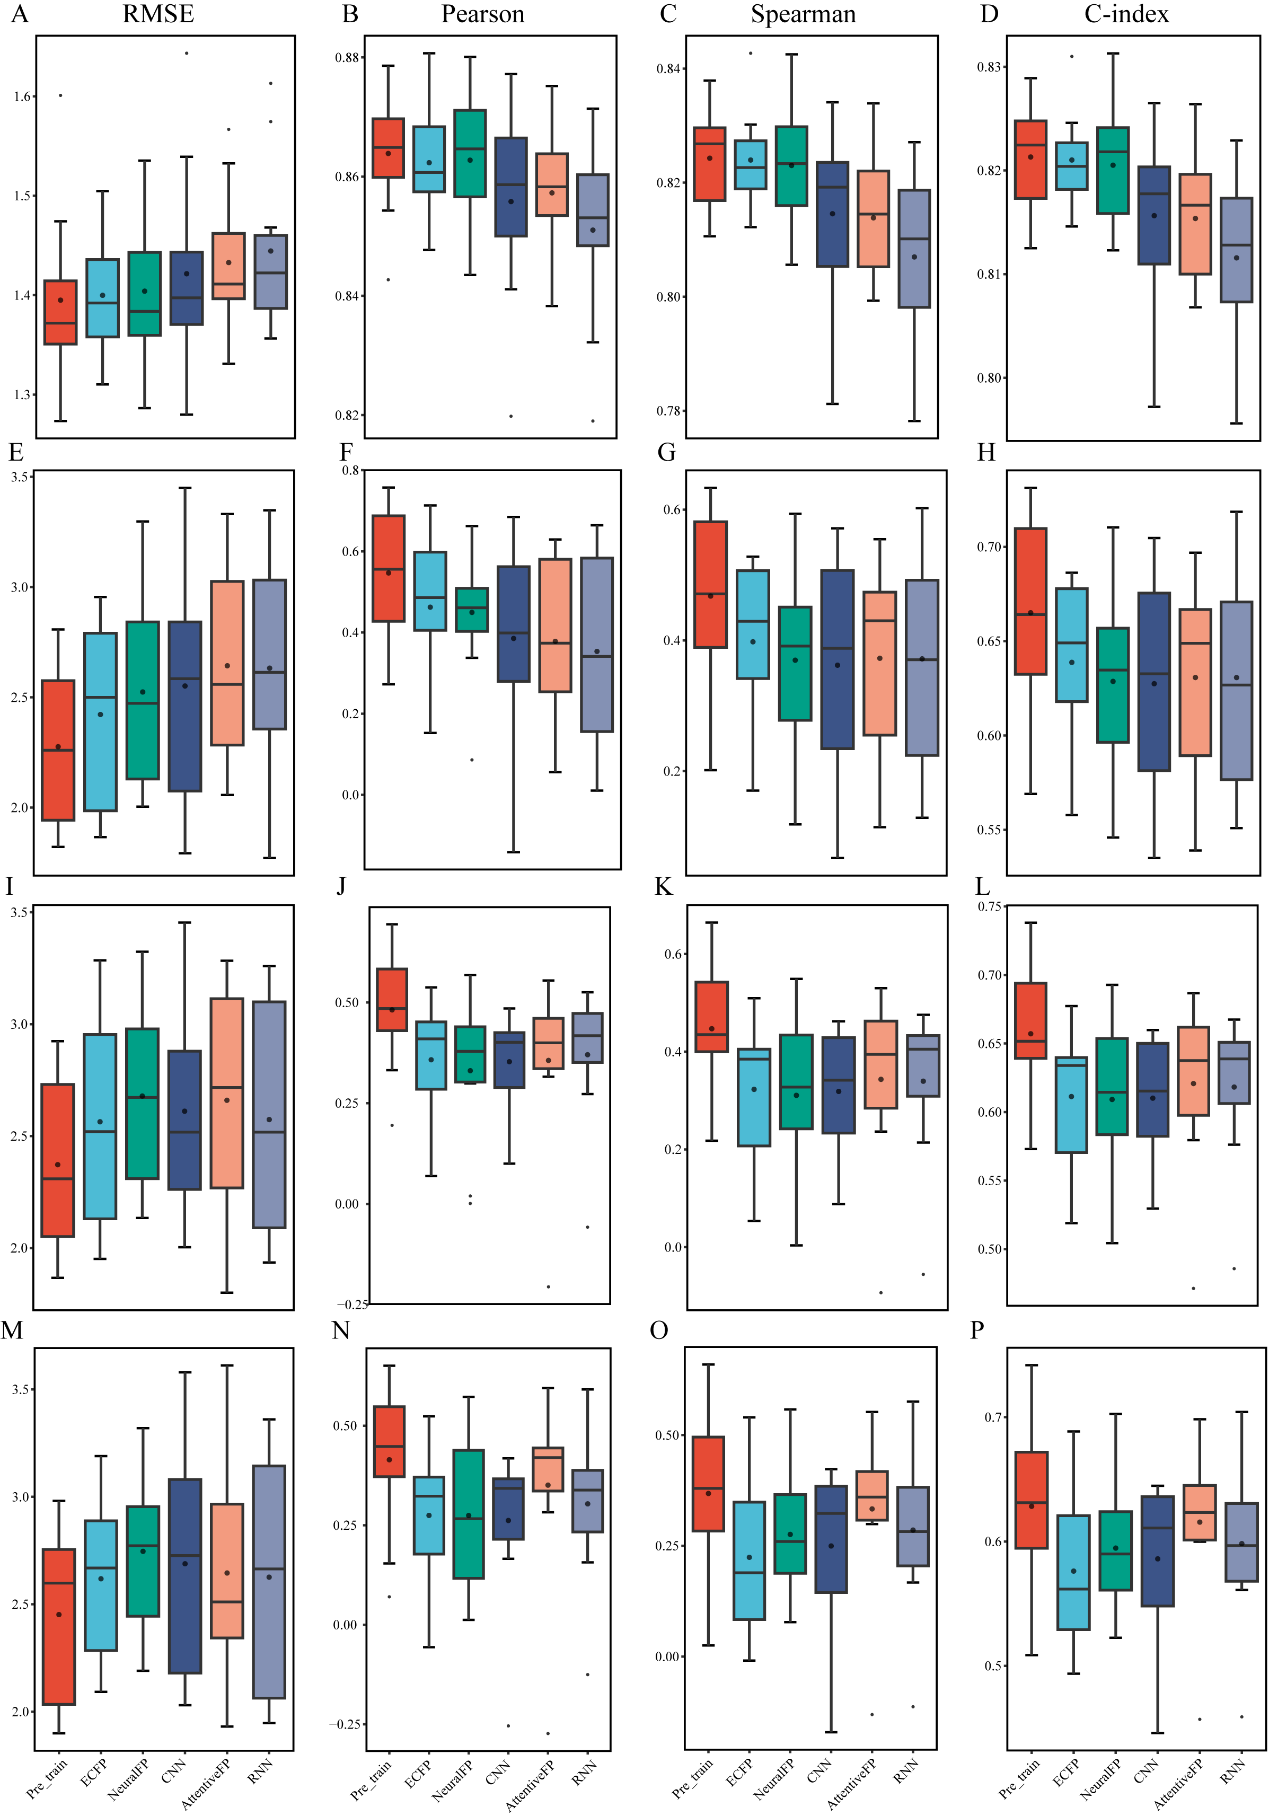


Figure S3. Comparative performance analysis of pre-trained TransCDR and its variants with diverse drug representation modules in cold cell (A-D), cold drug (E-H), cold scaffold (I-L), and cold cell & scaffold (M-P).

# References

[1] K.M. Moxley, D.S. McMeekin, Endometrial Carcinoma: A Review of Chemotherapy, Drug Resistance, and the Search for New Agents, Oncologist, 15 (2010) 1026-1033.

[2] K. Takemura, M. Noguchi, K. Ogi, T. Tokino, H. Kubota, A. Miyazaki, G. Kohama, H. Hiratsuka, Enhanced Bax in oral SCC in relation to antitumor effects of chemotherapy, Journal of Oral Pathology & Medicine, 34 (2005) 93-99.

[3] F. Punzo, C. Tortora, D. Di Pinto, E. Pota, M. Argenziano, A. Di Paola, F. Casale, F. Rossi, Bortezomib and endocannabinoid/endovanilloid system: a synergism in osteosarcoma, Pharmacological Research, 137 (2018) 25-33.

[4] L.S. Zhang, M. He, Y.Q. Zhang, N. Nilubol, M. Shen, E. Kebebew, Quantitative High-Throughput Drug Screening Identifies Novel Classes of Drugs with Anticancer Activity in Thyroid Cancer Cells: Opportunities for Repurposing, Journal of Clinical Endocrinology & Metabolism, 97 (2012) E319-E328.

[5] A. Durkin, H.Y. Vu, H. Lee, The VR23 Antitumor Compound Also Shows Strong Anti-Inflammatory Effects in a Human Rheumatoid Arthritis Cell Model and Acute Lung Inflammation in Mice, Journal of Immunology, 204 (2020) 788-795.

[6] R. Matsuda, H. Sakagami, S. Amano, Y. Iijima, M. Sano, Y. Uesawa, N. Tamura, Y. Oishi, H. Takeshima, Inhibition of Neurotoxicity/Anticancer Activity of Bortezomib by Caffeic Acid and Chlorogenic Acid, Anticancer Research, 42 (2022) 781-790.

[7] R.J.R. Rao, A.K.S.B. Rao, K. Swapna, B.B. Rani, S.P. Kumar, S. Awantika, Y.L.N. Murthy, Design, Synthesis and Biological Evaluation of Novel Analogs of Bortezomib, Journal of the Korean Chemical Society, 55 (2011) 765-775.

[8] G.B. Lesinski, E.T. Raig, K. Guenterberg, L. Brown, M.R. Go, N.N. Shah, A. Lewis, M. Quimper, E. Hade, G. Young, A.R. Chaudhury, K.J. Ladner, D.C. Guttridge, P. Bouchard, W.E. Carson, IFN-alpha and Bortezomib Overcome Bcl-2 and Mcl-1 Overexpression in Melanoma Cells by Stimulating the Extrinsic Pathway of Apoptosis, Cancer Research, 68 (2008) 8351-8360.

[9] K.I. Amiri, L.W. Horton, B.J. LaFleur, J.A. Sosman, A. Richmond, Augmenting chemosensitivity of malignant melanoma tumors via proteasome inhibition: Implication for bortezomib (VELCADE, PS-341) as a therapeutic agent for malignant melanoma, Cancer Research, 64 (2004) 4912-4918.

[10] A. Calastretti, F. Rancati, M.C. Ceriani, L. Asnaghi, G. Canti, A. Nicolin, Rapamycin increases the cellular concentration of the BCL-2 protein and exerts an anti-apoptotic effect, European Journal of Cancer, 37 (2001) 2121-2128.
